# Supplementary material
Source: publisher figshare collection journal article supplement (https://acs.figshare.com/ndownloader/files/4269412)

# Supplementary Information

**Table S1** Information on volunteers and time points at which faecal samples were collected. Coding of the disease score is based on Walmsley, R.S. et al. A simple clinical colitis index. *Gut* **1998**, 43, 29-32.

| Group and subject | Age | Sex | Disease score | Sample time points (months) and sample codes |                   |                   |                   |
|-------------------|-----|-----|---------------|----------------------------------------------|-------------------|-------------------|-------------------|
|                   |     |     |               | 0 mo.                                        | 6 mo.             | 12 mo.            | extra             |
| UC1               | 56  | F   | 1             | 1-1                                          | 1-2               | 1-3               | -                 |
| UC3               | 51  | M   | 1             | 3-1                                          | 3-2               | 3-3               | 3-F <sup>a</sup>  |
| UC4               | 56  | M   | 1             | 4-1                                          | 4-2               | 4-3               | -                 |
| UC5               | 26  | F   | 4             | 5-1                                          | 5-2               | -                 | -                 |
| UC6               | 58  | F   | 2             | 6-1                                          | -                 | -                 | -                 |
| UC7               | 60  | F   | 3             | 7-1                                          | 7-2               | 7-1F <sup>a</sup> | 7-2F <sup>a</sup> |
| UC8               | 55  | F   | 6             | 8-1                                          | 8-2               | 8-3               | 8-F <sup>a</sup>  |
| UC10              | 32  | M   | 2             | 10-1 <sup>b</sup>                            | 10-2              | -                 | -                 |
| UC11              | 54  | F   | 1             | 11-1                                         | 11-2              | 11-3              | -                 |
| UC13              | 63  | M   | 2             | 13-1                                         | 13-2              | -                 | -                 |
| UC14              | 29  | M   | 2             | 14-1                                         | -                 | -                 | -                 |
| UC15              | 34  | F   | 1             | 15-1                                         | 15-2              | -                 | -                 |
| UC16              | 63  | F   | 1             | 16-2                                         | -                 | -                 | -                 |
| IBS1              | 39  | F   | NA            | 1-1                                          | -                 | -                 | -                 |
| IBS2              | 36  | M   | NA            | 2-1                                          | -                 | -                 | -                 |
| IBS3              | 57  | F   | NA            | 3-1                                          | 3-2               | 3-3               | -                 |
| IBS4              | 55  | F   | NA            | 4-1                                          | 4-2               | 4-3               | -                 |
| IBS5              | 41  | M   | NA            | 5-1                                          | 5-2               | 5-3               | -                 |
| IBS6              | 42  | F   | NA            | 6-1                                          | 6-2               | -                 | -                 |
| IBS7              | 53  | F   | NA            | 7-1                                          | 7-2               | 7-3               | -                 |
| IBS10             | 35  | M   | NA            | 10-1                                         | -                 | -                 | -                 |
| IBS14             | 42  | M   | NA            | 14-1                                         | 14-2              | -                 | -                 |
| IBS16             | 41  | F   | NA            | 16-1                                         | 16-2              | -                 | -                 |
| C1                | 36  | F   | NA            | 1-1                                          | -                 | -                 | -                 |
| C3                | 46  | F   | NA            | 3-1                                          | 3-2               | 3-3               | 3-4               |
| C4                | 54  | F   | NA            | 4-1                                          | 4-2               | 4-3               | 4-4               |
| C5                | 37  | M   | NA            | 5-1                                          | 5-2               | 5-3               | 5-4               |
| C8                | 52  | F   | NA            | 8-1                                          | 8-2               | 8-3               | 8-4               |
| C9                | 37  | F   | NA            | 9-1                                          | 9-2               | 9-3               | 9-4               |
| C10               | 46  | F   | NA            | 10-1                                         | 10-2              | 10-3              | 10-4              |
| C11               | 55  | F   | NA            | 11-1                                         | 11-2              | 11-3              | 11-4              |
| C12               | 40  | F   | NA            | 12-1                                         | 12-2              | 12-3              | -                 |
| C13               | 60  | F   | NA            | 13-1                                         | 13-2              | 13-3              | -                 |
| C14               | 39  | F   | NA            | 14-1                                         | 14-2              | 14-3              | 14-4              |
| C15               | 43  | M   | NA            | 15-1                                         | 15-2              | 15-3              | 15-4              |
| C16               | 38  | F   | NA            | 16-1                                         | 16-2              | -                 | -                 |
| C17               | 55  | M   | NA            | 17-1                                         | 17-2              | -                 | -                 |
| C18               | 56  | F   | NA            | 18-1                                         | 18-2              | 18-3              | 18-4              |
| C19               | 58  | M   | NA            | 19-1                                         | 19-2 <sup>b</sup> | -                 | 19-4              |
| C21               | 40  | M   | NA            | 21-1                                         | 21-2 <sup>b</sup> | 21-3              | -                 |
| C22               | 55  | F   | NA            | 22-1                                         | 22-2              | 22-3              | 22-4              |
| C24               | 60  | F   | NA            | 24-1                                         | 24-2              | 24-3              | -                 |
| C25               | 37  | F   | NA            | 25-1                                         | 25-2              | 25-3              | 25-4              |
| C26               | 36  | M   | NA            | 26-1                                         | 26-2              | 26-3              | -                 |
| C27               | 44  | M   | NA            | 27-1                                         | 27-2              | 27-3              | -                 |

<sup>a</sup> Flare up sample

<sup>b</sup> Excluded because of poor spectral quality

**Table S2** Excel file of NMR buckets used in all data analyses involving UC samples. Each row corresponds to one bucket; first and second columns give upper and lower limits (ppm) of each variable width bucket.

**Table S3** Excel file of NMR buckets used in data analyses *not* involving UC samples. Each row corresponds to one bucket; first and second columns give upper and lower limits (ppm) of each variable width bucket.

## 2D NMR methods

Standard Bruker pulse sequences (with gradients and water presaturation) were used with long total acquisition times to detect minor signals: COSY *cosygpprqf*, data points 4096x512, spectral width 12 ppm x 12 ppm, 64 scans per  $t_1$  increment; HSQC *hsqcetgpprsisp2.2* 2048 x 256, 12 ppm ( $^1\text{H}$ ) x 165.7 ppm ( $^{13}\text{C}$ ), 192 scans; HMBC *hmbcgplndprqf* 2048 x 256, 12 ppm ( $^1\text{H}$ ) x 250 ppm ( $^{13}\text{C}$ ), 272 scans. Spectra were processed with zero filling in both dimensions and standard windows (unshifted SINE for magnitude mode COSY, JRES and HMBC; 90° phase shifted QSINE for phase sensitive HSQC).

**Figure S1** Superimposed 2D NMR spectra ( $^1\text{H}$ - $^{13}\text{C}$  HSQC) of two typical samples (UC green; C red). Numbering of peaks corresponds to Figure 1 and Table 2. Some low concentration components not shown here were identified by COSY and are also listed in Table 2.

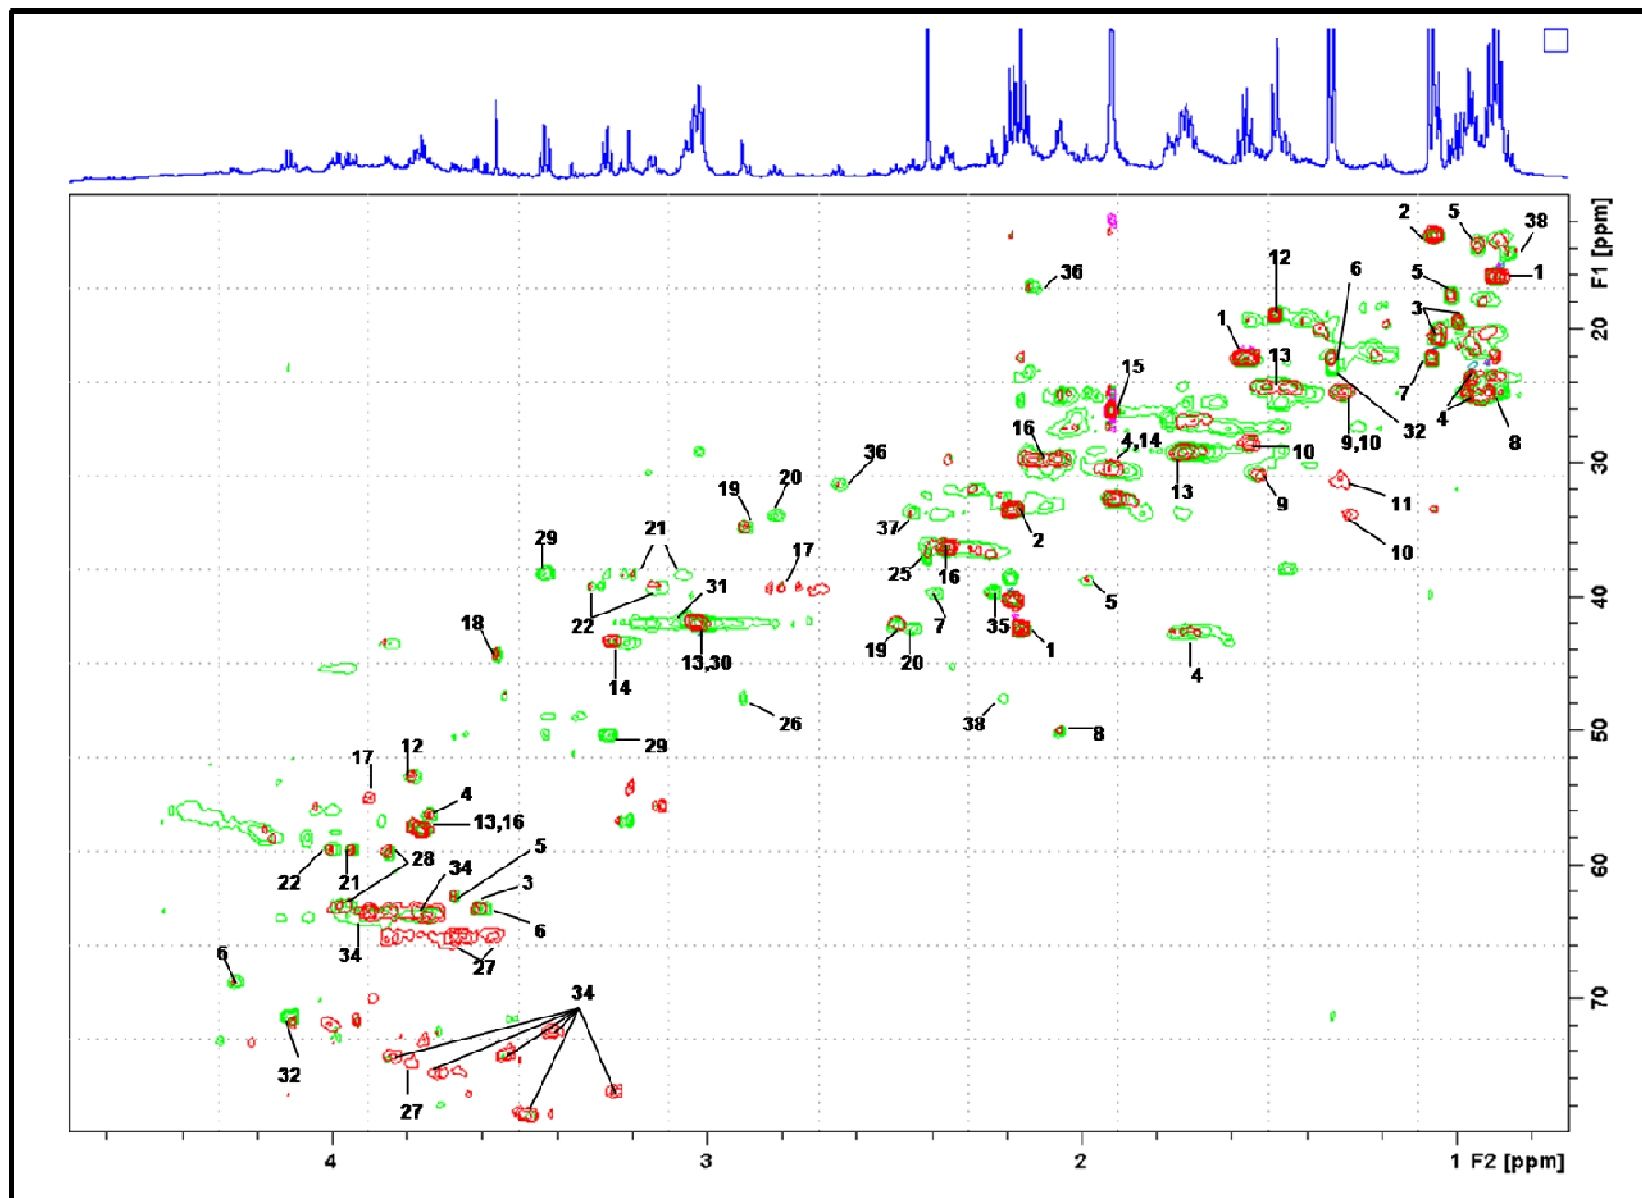

**Figure S2** Selectivity ratios for variables (buckets) in the three group, 11LV PLS-DA model for the UC and IBS groups (see Figures 2c and 2d in main text).

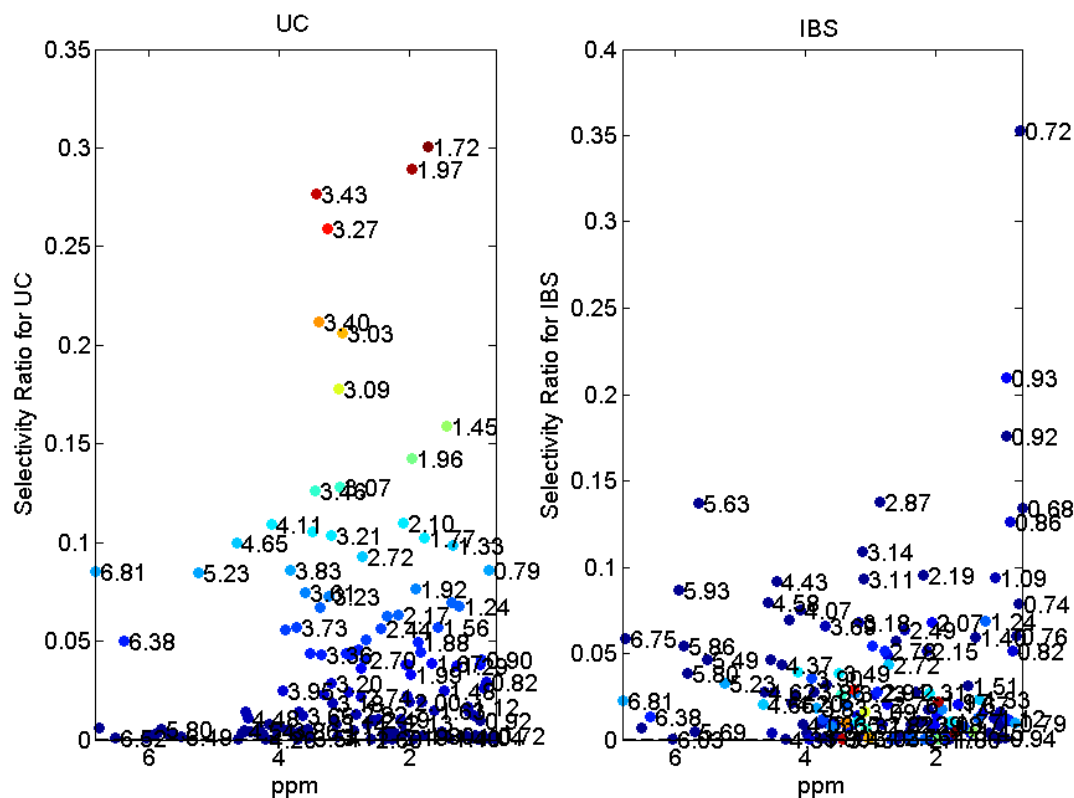

**Figure S3** VIP scores for variables (buckets) in the three group, 11LV PLS-DA model for the UC and IBS groups (see Figures 2c and 2d in main text).

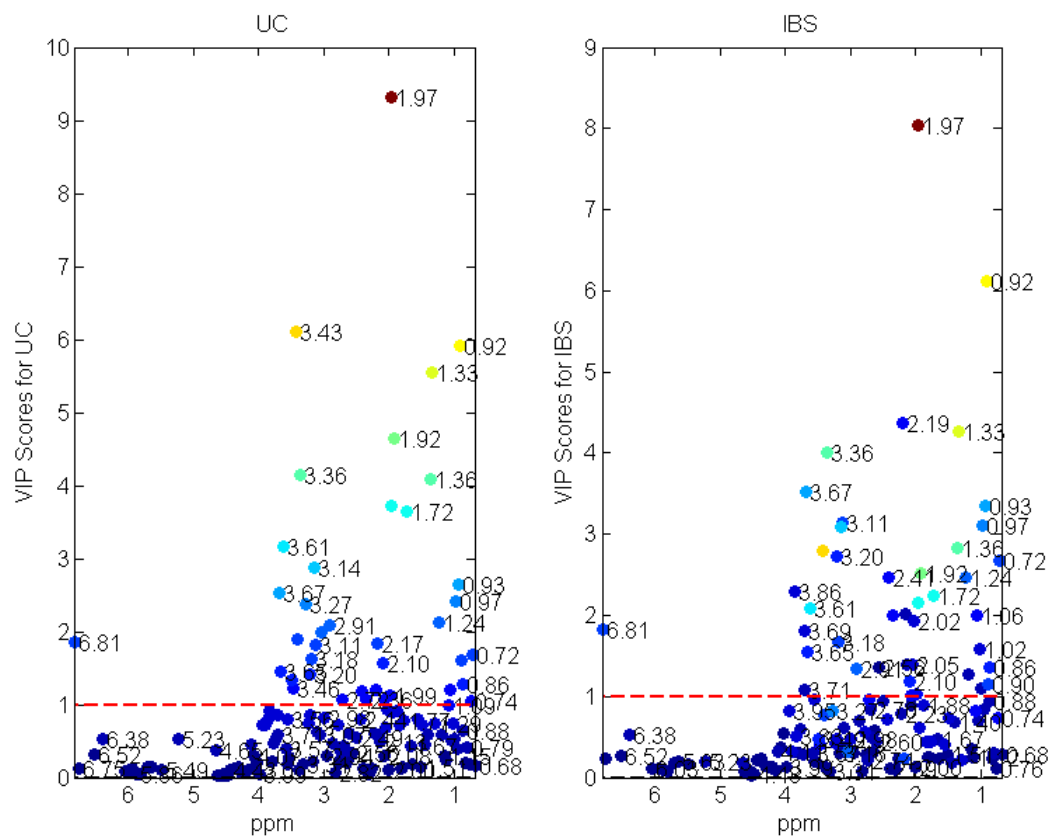

**Figure S4** Faecal calprotectin measurements for C (Control), UC and IBS samples

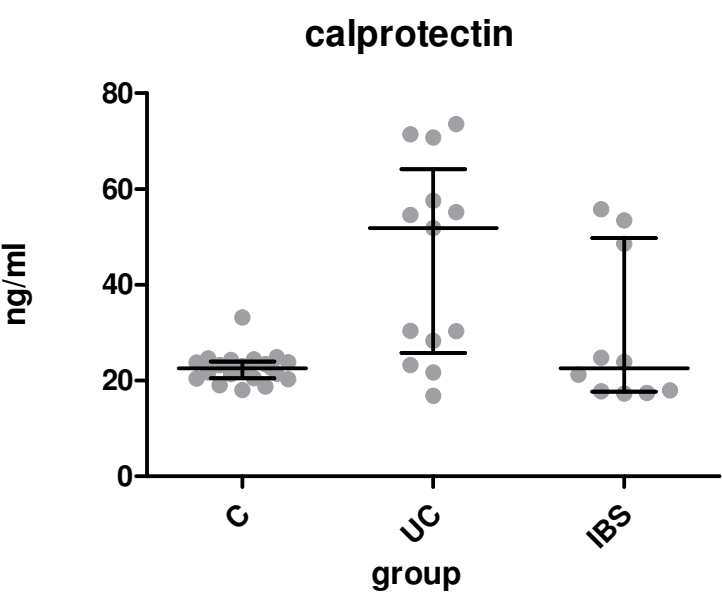

Supplement: Supplementary file 1 [file 4269412]
